# Supplementary material for: Macrophages Derived From Human Induced Pluripotent Stem Cells: The Diversity of Protocols, Future Prospects, and Outstanding Questions
Source: Front Cell Dev Biol. 2021 Jun 2;9:640703. doi: 10.3389/fcell.2021.640703 (PMC8207294; doi:10.3389/fcell.2021.640703)
Supplement: Supplementary file 1 [file Table_1.XLSX]

## Sheet: Лист1
Supplement Table 1. General culture conditions used at different stages of iMph differentiation
References	Cell source	iPSC maintainance and expansion (iPSC)					Mesoderm and HE induction (M/HE)						Hematopoietic and myeloid differentiation (HP/MY)					Macrophage terminal differentiation (MF)
		Medium	Supplement2;3	Feeder	Plastic	Dissociation	Medium1	Supplement2	Plastic	Factors	Special conditions	Duration	Medium1	Plastic	Factors	Day of first iMC collection	Frequency and duration of iMC/iMph collection	Medium1	Plastic	Factors	Stage duration
EB-S		EB-S					EB-S						EB-S					EB-S
Panicker et al., 2012	hiPSCs &hESCs	DMEM/F12 +20% KSR	10 ng/ml FGF2	MEFs	TC plates (gelatin-coated)	Dispase	DMEM/F12 + 20% KSR	10 ng/ml FGF2	6-well ULA plates	-		4 days	DMEM+ 10% FBS	6-well TC plates (gelatin-coated)	IL3 /M-CSF	iMC production started within 15–20 d	Every 4-5 days during 3 month	RPMI + 10% FBS	TC plates	M-CSF	3 days
van Wilgenburg et al., 2013	hiPSCs &hESCs	KO-DMEM/F12 +10% KSR	10 ng/ml FGF2 5 ug/ml heparin 0,5% albumin	MEFs	TC plates (gelatin-coated)	mechanically with 23G needle	KO-DMEM/F12 + 10% KSR	10 ng/mL FGF2; 5ug/ml heparin; 0,5% albumin	6-well ULA plates	-		4 days	X-VIVO 15	6-well or 24-well TC plates	IL3 /M-CSF	Within 2 weeks	Once a week for up to 52 weeks	RPMI + 10% FCS or X-VIVO-15	TC plates	M-CSF	5–7 days
Alasoo et al., 2015	iPSC	Advanced DMEM/F12 +20%KSR	4 ng/ml FGF2	MEFs	TC plates (gelatin-coated)	Collagenase & Dispase	Advanced DMEM/F12 +20% KSR		100mm low adhesive bacteriological plates	-		3 days	X-VIVO 15 + 10% FBS	TC plates (gelatin-coated)	IL3 /M-CSF	After 3–4 weeks	Every 4–7 days	RPMI + 10% FBS	TC plates	M-CSF	7 days
Lachmann et al., 2015	iPSCs & ESCs	KO-DMEM + 20% KSR	40 ng/ml FGF2	MEFs	TC plates (gelatin-coated)	Collagenase V	KO-DMEM/F12 + 20% KSR	10μM Y-27632	6-well suspension plates	FGF2	Orbital shaker 100 rpm	5 days	APEL	6-well TC plates	IL3 /M-CSF	From d10–d15 onward	Twice a week, more than 2 months.	RPMI + 10% FCS	TC plates	M-CSF	7-10 days
Neehus et al., 2017	iPSC	KO-DMEM + 20% KSR	20 ng/ml FGF2	MEFs	TC plates (gelatin-coated)	Collagenase V	KO-DMEM + 20% KSR	10μM Y-27632	6-well suspension plates	-		5 days	X-VIVO 15	TC plates	IL3 /M-CSF	NA	Once a week	RPMI + 10% FCS	TC plates	M-CSF	NA
Ackermann et al., 2018	hiPSC	KO-DMEM/F12 + 20% KSR	10 ng/ml FGF2	MEFs	TC plates (gelatin-coated)	Collagenase IV	KO-DMEM/F12 +20% KSR	10μM Y-27632	Suspension plate	-	Orbital shaker 85 rpm	5 days	X-VIVO 15	TC plates	IL3 /M-CSF	From day 10 to 15 onwards	Once a week for up to 3 months.	RPMI + 10% FCS	TC plates	M-CSF	7 days
	hiPSC	KO-DMEM/F12 + 20% KSR	10 ng/ml FGF2	MEFs	TC plates (gelatin-coated)	Collagenase IV	KO-DMEM/F12 + 20% KSR	10μM Y-27632	Equilibrated bioreactor 50rpm	-		5 days	X-VIVO 15	Equilibrated bioreactor 50rpm	IL3 /M-CSF	From day 10 onwards	Once a week for more than 5 weeks	RPMI + 10% FCS	TC plates	M-CSF	7 days
Hong et al., 2018	hiPSCs &hESCs	mTeSR1		No	TC plates (Matrigel)	Accutase	KO- DMEM/F12 + 10% KSR	10μM Y-27632	6-well ULA plates	-	shaker	8–11 days	DMEM + 10% FBS	24-well TC plates (gelatin-coated)	IL3 /M-CSF	17–19 days	Every 3 days?	RPMI + 10% FBS	TC plates	M-CSF	10 days
Mukherjee et al., 2018	iPSC	Advanced DMEM/F12 +20% KSR	4 ng/ml FGF2	MEFs	TC plates (gelatin-coated)	Collagenase IV& Dispase	Advanced DMEM/F12 + 20% KSR		100mm low adhesive bacteriological plates	-		5 days	X-VIVO 15	TC plates (gelatin-coated)	IL3 /M-CSF	NA	Every 5–7 days for several months	RPMI + 10% FCS	TC plates	M-CSF	7 days
Haake et al., 2020	iPSC	KO-DMEM +20% KSR	10 ng/ml FGF2	MEFs	Tissue culture plates (gelatin-coated)	Collagenase IV	KO-DMEM + 20% KSR		Suspension plate	-	Orbital shaker 80 rpm	5 days	X-VIVO 15	TC plates	IL3 /M-CSF	After 2 weeks	Weekly	RPMI + 10% FCS	TC plates	M-CSF	5-10 days
Klatt et al., 2020	iPSC	DMEM/F12 +20%KSR	20 ng/ml FGF2	MEFs	TC plates (gelatin-coated)	Dispase	KO-DMEM + 20% KSR	10μM Y-27632	Suspension plates	-	Orbital shaker 80 rpm	5 days	APEL2	TC plates	IL3 /M-CSF	NA	Once a week	RPMI + 10% FCS	TC plates	M-CSF	NA
Lipus et al., 2020	iPSCs	KO-DMEM + 20% KSR	10 ng/ml FGF2	MEFs	TC plates (gelatin-coated)	Collagenase IV	KO-DMEM + 20% KSR	10μM Y-27632	6-well suspension plates on orbital shaker 100 rpm	-		5 days	X-VIVO 15	6-well TC plates	IL3 /M-CSF	From day 10 to day 15 onwards	Once a week	RPMI + 10% FCS	TC plates	M-CSF	5-10 days
Nenasheva et al., 2020	iPSCs	KO-DMEM + 20% KSR	10 ng/ml FGF2	MEFs	TC plates (gelatin-coated)	Collagenase IV	KO-DMEM + 20% KSR		6-well suspension plates			4 days	X-VIVO 15	6-well TC plates	IL3 /M-CSF	After 2 weeks	Once a week	X-VIVO-15	TC plates	M-CSF	7 days
EB-F (HP+MY)		EB-F (HP+MY)					EB-F (HP+MY)						EB-F (HP+MY)					EB-F (HP+MY)
van Wilgenburg et al., 2013	iPSCs &ESCs	mTeSR1	-	No	Synthemax plate	TripLE	mTeSR1	1μM Y-27632	96-well ULA plates or AggreWells800 centrifuged 800-3000rpm	BMP4 / VEGF / SCF		4 days	X-VIVO 15	24-well TC plates	IL3 /M-CSF	Within 2 weeks	Once a week for up to 52 weeks	X-VIVO-15	TC plates	M-CSF	5–7 days
Yeung et al., 2017 (Hale et al., 2015)	iPSCs	TeSR E8	-	No	TC plates (Synthemax II-SC substrat)	NA	DMEM/F12 + 20%KSR	NA	6-well ULA plates	BMP4		4 days	X-VIVO 15	24-well TC plates	IL3 /M-CSF	In two weeks	Once a week for up to day 62	RPMI + 10% FCS	TC plates	M-CSF	7 days
Buchrieser et al., 2017	iPSCs	mTeSR1	-	No	TC plates (Matrigel)	TrypLE Express	mTesR1	10μ M Y-27632	96-well ULA plates, centrifuged 100g	BMP4 / VEGF / SCF		4 days	X-VIVO 15	6-well TC plates	IL3 /M-CSF	In 8-15 days	Every 7 days for up to 30 days	X-VIVO 15	TC plates	M-CSF	7 days
Gutbier, 2020	iPSCs	mTesR1	-	No	Laminin-521-coated plates	Accutase	mTesR1	10 µM Y-27632	AggreWell 800	BMP4 / VEGF / SCF		4 days	X-VIVO	Matrigel-coated culture vessels	IL3 /M-CSF	15 days	18–25 harvests for up to 120 days	X-VIVO	Ыpinner culture	M-CSF	Storage up to 2 mo
Lopez-Yrigoyen et al., 2020	iPSCs	DMEM/F12+ 1,8% BSA	20 ng/ml FGF2	No	TC plates (CTS Cellstart Substratet)	StemPro EZPassage Disposable Stem Cell Passaging Tool	DMEM/F12	hESC supplement: 1,8% w/v BSA	6-well ULA plates	BMP4 / VEGF / SCF		4 days	X-VIVO 15	6-well TC plates (gelatin-coated)	IL3 /M-CSF	After 2–3 weeks	Every 3-4 days for up to 3-5 months	X-VIVO-15	Bacteriological-grade plates or 6 well TC plates	M-CSF	9–11 days
EB-F (HP-->MY)		EB-F (HP-->MY)					EB-F (HP-->MY)						EB-F (HP-->MY)					EB-F (HP-->MY)
Zhang etal., 2015	iPSCs	DMEM/F12 +20%KSR	10 ng/ml FGF2	MEF-depleted	TC plates (Matrigel)	Collagenase B/ DNase I & trypsin/EDTA	StemPro-34	50ug/ml Ascorbic acid 150 ug/ml hTransferrin MTG	ULA plates	BMP4 / VEGF / SCF / FGF2 / Flt3L / TPO	Hypoxia	4 days	HP: StemPro-34 MY: RPMI+ 20%FBS	The same ULA plates	HP: VEGF / FGF2 / SCF / Flt3L / TPO MY: M-CSF	In 15 days	Harvested on day 15 (one-off collection)	RPMI + 20% FBS	TC plates	M-CSF	7 days
Shi et al., 2019	iPSCs	advanced DMEM/F12 +20% KSR	10 ng/ml FGF2	MEF-depleted	TC plates (Matrigel)	Collagenase B/DNaseI & Trypsin-EDTA	StemPro-34	50ug/ml Ascorbic acid 150 ug/ml hTransferrin MTG	ULA plates	BMP4 / VEGF / SCF / FGF2 / Flt3L / TPO	Hypoxia	4 days	HP: StemPro-34 MY: RPMI+ 20%FBS	The same ULA plates	HP: VEGF / FGF2 / SCF / Flt3L / TPO MY: M-CSF	In 15 days	Harvested on day 15 (one-off collection)	RPMI + 20% FCS	Primaria plates	M-CSF	7 days
Joshi et al., 2019	iPSCs	KO-DMEM + 20% KSR, E8 after MEF-depletion	50 ng/ml FGF2	MEF-depleted	TC plates (coating NA)	NA	mTeSR1, StemPro-34 starting d4 KO-DMEM + 20% KSR	50ug/ml Ascorbic acid 150 ug/ml hTransferrin MTG	bacteriological grade Petri dishes on orbital shaker 40 rpm	BMP4 / VEGF / CHIR99021 / Activin A / SCF / FGF2		4 days	StemPro-34	6-well TC plates (Matrigel-coated)	HP: VEGF / FGF2 / SCF / IL3 / MCSF MY: VEGF / FGF / SCF / Flt3L / IL3 / M-CSF	Days 14-21	Day ~28	RPMI + 10% FBS	Primaria plates	M-CSF or GM-CSF	5-7 days
2D-F		2D-F					2D-F						2D-F					2D-F
Cao, 2020	iPSCs	TeSR-E8	-	No	TC plates (Vitronectin)	GCDR (Gentle Cell Diss. Reagent)	IMDM/F12	5% PVA lipids 5mg/ml AA2P	6-well TC plates (Matrigel)	BMP4 / CHIR99021 / Activin A / VEGF / SB411542 / FGF2 / SCF		5 days	IMDM/F12	6-well TC plates (Matrigel-coated); d9 - 24-well ULA plates (after dissociation with TrypLE/ Accutase)	HP: VEGF / FGF2 / SCF /TPO / IL3 / IL6 MY: IL6/ IL3 / M-CSF	Day 14-15	One-off collection; CD14+ cells were sorted and cryopreserved	IMDM/F12	6-well TC plates (preincubated with FBS)	M-CSF	6 days
Takata, 2017	iPSCs	mTeSR1	-	No	TC plates (Matrigel)	Collagenase IV	StemPro-34	0,5mM Ascorbic acid 200 ng/ml hTransferrin MTG	6-well TC plates (Matrigel)	BMP4 / VEGF / CHIR99021 / FGF2	Hypoxia	6 days	StemPro-34	6-well TC plates (Matrigel-coated)	HP: VEGF / DKK1 / FGF2 / SCF / IL3 / IL6 MY: FGF2 / SCF / IL3 / IL6	NA	MF stage was performed in the same plate without iMC collection	IMDM/F12	6-well TC plates (Matrigel)	M-CSF	9 days in the same plate
Konttinen, 2019 (microglia)	iPSCs	Essential E8	-	No	TC plates (Matrigel)	EDTA or Accutase	E8 (d0-d2) DMEM/F12 (d2-->) mTeSR-E8 +	0,0543% sodium bicarbonate 14 ug/L sodium selenite 5ug/ml insulin Asccorbic acid, 10μM Y-27632 at day 0; 1μM Y-27632 at day 1	6-well TC plates (Matrigel)	BMP4 / CHIR99021 / Activin A / VEGF / SB411542 / FGF2	Hypoxia	4 days	IMDM +10% FBS or DMEM/F12 + 14 ug/L sodium selenite 64mg/L Ascorbic acid	ULA plates	HP: VEGF / FGF2 / SCF / IL3 / IL6 MY: M-CSF	EMPs on day 8-24	One-off collection	IMDM + 10% FBS 5ug/ml insulin	ULA plates	M-CSF and IL34	iMF 8 days
Yanagimachi, 2013	iPSCs &ESCs	mTeSR1	-	No	TC dishes (Growth factor reduced Matrigel)	NA	mTeSR1 (d0-4) StemPro-34 (d4-->)		100mm TC plates (Growth factor reduced Matrigel)	BMP4 / VEGF / FGF2 / SCF	BMP4 was added after cell Aggregates reached 1 mm diameter	6 days	StemPro-34	100mm TC plates (Growth factor reduced Matrigel)	HP: SCF /Flt3L / TPO / IL3 /M-CSF MY: Flt3L / M-CSF / GM-CSF	Day 16	3-4 harvests during days 16-28 days	RPMI + 10% FBS	6-well tissue culture plate	M-CSF	7 days with medium change on day 4
Douvaras, 2017 (microglia)	iPSCs &ESCs	mTeSR1	-	No	TC plates (Matrigel)	Accutase Enzymatic	Custom mTeSR1	without Lithium Chloride, GABA, Pipecolic Acid, FGF2 and TGFβ1	TC dishes (Matrigel)	BMP4 / VEGF / FGF2 / SCF		6 days	StemPro-34	6-well TC plates (Matrigel-coated)	HP: SCF /Flt3L / TPO / IL3 /M-CSF MY: Flt3L / M-CSF	Day 16	Harvested btween days 25 and 50, cryopreserved	RPMI-1640	TС plates	GM-CSF and IL34	2 weeks with medium change every 3--4 days
1, Exact lists of exogenous factors and small molecules which were added to the medium are indicated in Tables 5, 6, 7
2, Standard supplements (NEAA, Glutamine/GlutaMAX, β-mercaptoethanol, MTG, penicillin, streptomycin et al.) are not indicated
3, Y, Y-27632 (added for 24 h)
AA2P, L-Ascorbic acid 2-phosphate; BSA, Bovine serum albumin; MEFs, murine embryonic fibroblasts; NA, data not available; PVA, Polyvinyl alcohol; TC, tissue culture; ULA, ultra-low adhesive
